# Supplementary material
Source: MDPI journal article supplement (https://www.mdpi.com/1996-1073/8/9/9794)
Supplement: s1 [file s1]

## Supplementary Materials

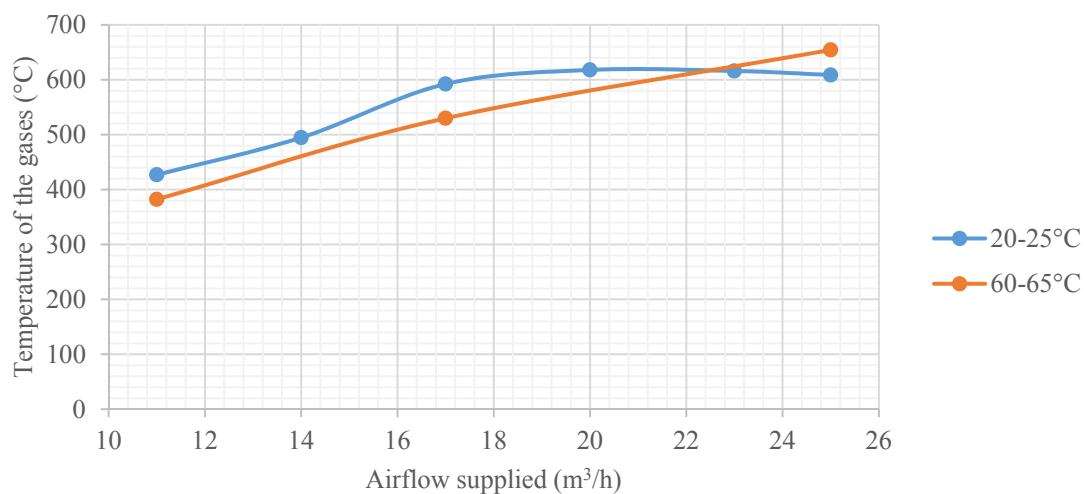

**Figure S1.** Average temperatures of the combustion gases released in the deposition probe zone as function of the airflow supplied (11, 14, 17, 20, 23 and 25 m<sup>3</sup>/h) and the temperature of the deposition probe (20–25 °C and 60–65 °C).

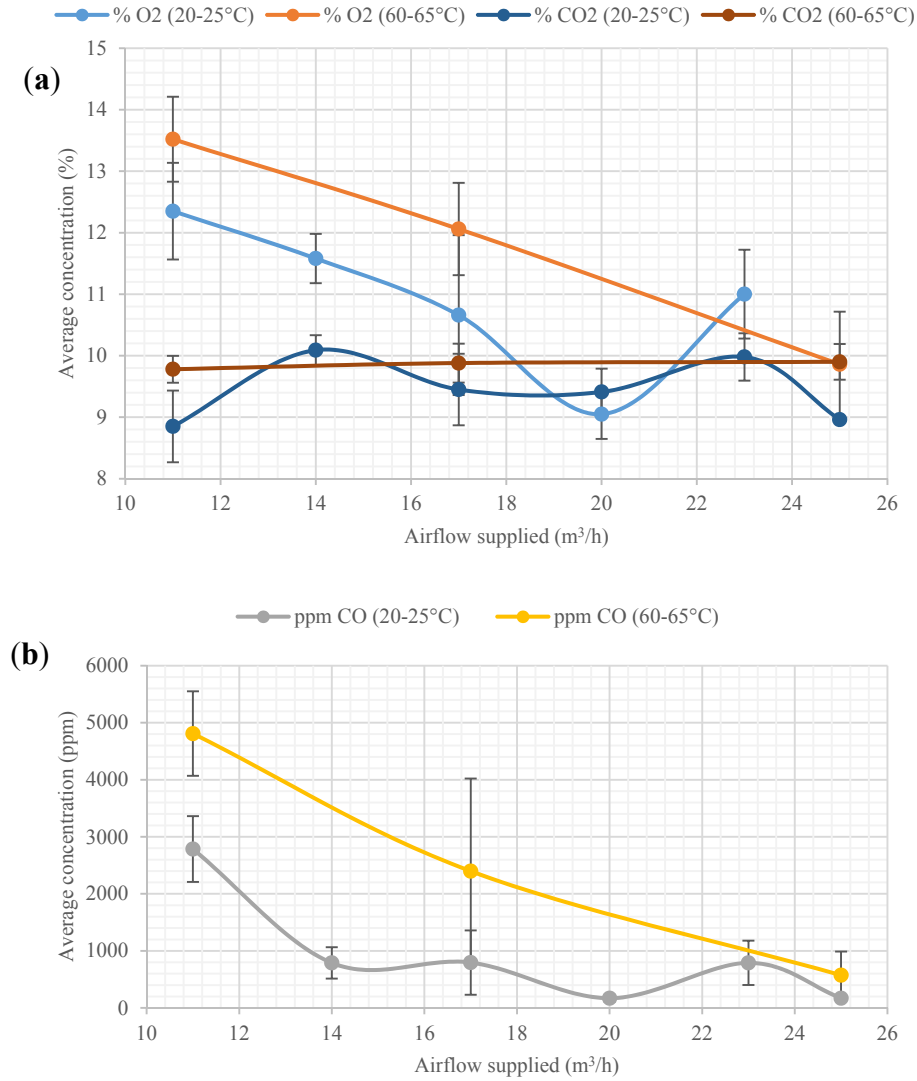

**Figure S2.** Average concentration of main flue gases components with their standard deviation as function of the airflow supplied (11, 14, 17, 20, 23 and 25 m<sup>3</sup>/h) and the deposition probe temperature (20–25 °C and 60–65 °C). **(a)** % of O<sub>2</sub> and CO<sub>2</sub> and **(b)** ppm of CO.
